# Supplementary material for: Identification and Functional Analysis of Two Mitoferrins, CsMIT1 and CsMIT2, Participating in Iron Homeostasis in Cucumber
Source: MDPI journal article supplement (doi:10.3390/ijms24055050), 2023-03-06
Supplement: s1 [file s1]

# Identification and functional analysis of two mitoferrins, CsMIT1 and CsMIT2, participating in iron homeostasis in cucumber

Karolina Małas<sup>1</sup> and Katarzyna Kabala<sup>1,\*</sup>

Department of Plant Molecular Physiology, Faculty of Biological Sciences, University of Wrocław, Kanonia 6/8, 50-328 Wrocław, Poland

\* Correspondence: [katarzyna.kabala@uwr.edu.pl](mailto:katarzyna.kabala@uwr.edu.pl)

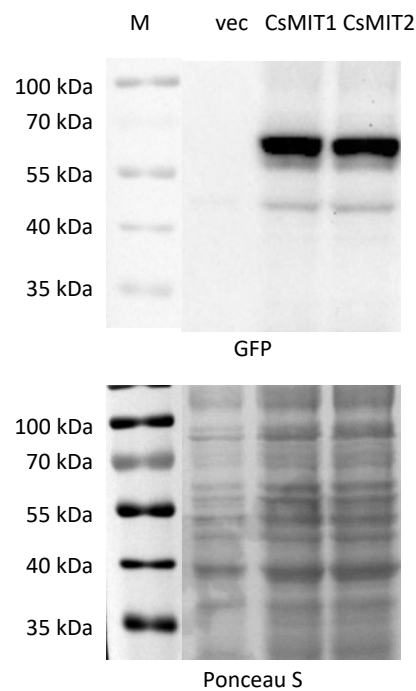

Figure S1- Immunoblotting of the mitochondria isolated from  $\Delta mrs3\Delta mrs4$  strain transformed with either pUG23-GFP (vec), pUG23-CsMIT1-GFP (CsMIT1) or pUG23-CsMIT2-GFP (CsMIT2) vector, using the antibodies against GFP.

Table S1. The sequences of primers used in this work. The restriction sites are underlined.

| Primers                                                                                   | Sequences (5'-3')                                 |
|-------------------------------------------------------------------------------------------|---------------------------------------------------|
| <b><i>Primers used for amplification of full coding sequence of CsMIT1 and CsMIT2</i></b> |                                                   |
| for ligation of CsMIT1 into pUG23 vector                                                  | forward: AAAT <u>CTAGA</u> ATGGCTACCGAGGCGA       |
|                                                                                           | reverse: TTT <u>GAATTC</u> GGTACCGTTGTGGCTGC      |
| for ligation of CsMIT2 into pUG23 or pUG35 vector                                         | forward: AAAGA <u>AATTC</u> ATGGCCACAAGCGTATC     |
|                                                                                           | reverse: TTT <u>GTCGAC</u> ATTGTTGTGATTGTGGAGATGT |
| for ligation of CsMIT1 into pA7-GFP vector                                                | forward: AAA <u>ACTAGT</u> ATGGCTACCGAGGCGA       |
|                                                                                           | reverse: TTT <u>ACTAGT</u> AGGTACCGTTGTGGCTGC     |
| for ligation of CsMIT2 into pA7-GFP vector                                                | forward: AAAG <u>TCGAC</u> ATGGCCACAAGCGTATC      |
|                                                                                           | reverse: TTT <u>ACTAGT</u> ATTGTTGTGATTGTGGAGATGT |
| <b><i>Primers used for real-time PCR</i></b>                                              |                                                   |
| CsMIT1                                                                                    | forward: CAATTAAATCTGTTGGAGTTCGAC                 |
|                                                                                           | reverse: ACTTCTTACAATTCTCGTAAACTG                 |
| CsMIT2                                                                                    | forward: CTTAGGTGGTGGATCGTCA                      |
|                                                                                           | reverse: CCTCTTTCGCAAACCTCGTA                     |
| CsCACS [51]                                                                               | forward: TGGGAAGATTCTTATGAAGTGC                   |
|                                                                                           | reverse: CTCGTCAAATTTACACATTGGT                   |

Table S2. Strains and plasmids used in this work.

| Strain                           | Genotype                                                                                                                                                                                                                               | Source or reference                                                 |
|----------------------------------|----------------------------------------------------------------------------------------------------------------------------------------------------------------------------------------------------------------------------------------|---------------------------------------------------------------------|
| <b>DY150</b>                     | <i>MATa ade2-1 can1-100 his3-11,15 leu2-3,112 trp1-1 ura3-52</i>                                                                                                                                                                       | [54]                                                                |
| <b>DY150<br/><i>mrs3mrs4</i></b> | <i>mrs3::KanMX mrs4::KanMX</i>                                                                                                                                                                                                         | [55]                                                                |
| <b>BY4742</b>                    | <i>MATa his3Δ1 leu2Δ0 lys2Δ0 ura3Δ0</i>                                                                                                                                                                                                | [56]                                                                |
| <b>BY4742 <i>zrc1</i></b>        | <i>zrc1::KanMX4</i>                                                                                                                                                                                                                    | Euroscarf, Germany                                                  |
| <b>BY4742 <i>cot1</i></b>        | <i>cot1::kanMX4</i>                                                                                                                                                                                                                    | Euroscarf, Germany                                                  |
| <b>BY4742 <i>ycf1</i></b>        | <i>ycf1:: kanMX4</i>                                                                                                                                                                                                                   | Euroscarf, Germany                                                  |
| <b>BY4742 <i>ace1</i></b>        | <i>ace1::KanMX4</i>                                                                                                                                                                                                                    | Euroscarf, Germany                                                  |
| Plasmid                          | Description                                                                                                                                                                                                                            | Source or reference                                                 |
| <b>pUG23</b>                     | <i>Escherichia coli</i> -yeast shuttle vector with the multiple cloning site (MCS) between the constitutive MET25 promoter and CYC1 termination sequence with C-terminal GFP reporter gene. HIS selectable marker and Amp <sup>r</sup> | [52]                                                                |
| <b>pUG35</b>                     | <i>Escherichia coli</i> -yeast shuttle vector with the multiple cloning site (MCS) between the constitutive MET25 promoter and CYC1 termination sequence with C-terminal GFP reporter gene. URA selectable marker and Amp <sup>r</sup> | [52]                                                                |
| <b>pA7-GFP</b>                   | pUC18-based vector for the transient expression of C-terminal GFP-fusion proteins in plant cells under the CaMV 35S promoter. Amp <sup>r</sup>                                                                                         | [53]                                                                |
| <b>pRS426</b>                    | <i>Escherichia coli</i> -yeast shuttle vector carrying the <i>gentisate 1,2-dioxygenase (GDO)</i> gene from <i>Pseudaminobacter salicylatoxidans</i> tagged with FLAG epitope. URA selectable marker and Amp <sup>r</sup>              | kindly provided by Prof. Jerry Kaplan from University of Utah (USA) |
